# Supplementary material for: Effectiveness of an mHealth system on access to eye health services in Kenya: a cluster-randomised controlled trial
Source: PubMed Central journal article supplement (PMC8239618; doi:10.1016/s2589-7500(21)00083-2), 2021-06-21
Supplement: mmc1.pdf [file mmc1.pdf]

# THE LANCET

## Digital Health

### Supplementary appendix

This appendix formed part of the original submission and has been peer reviewed. We post it as supplied by the authors.

Supplement to: Rono H, Bastawrous A, Macleod D, et al. Effectiveness of an mHealth system on access to eye health services in Kenya: a cluster-randomised controlled trial. *Lancet Digit Health* 2021; **3**: e414–24.

**Table S1: cluster characteristics**

|                                                      |            | <i>Control arm</i> | <i>Intervention arm</i> |
|------------------------------------------------------|------------|--------------------|-------------------------|
| <i>Distance from KEU</i>                             | Mean (SD)  | 19.8km (7.9)       | 18.3km (9.9)            |
| <i>Population</i>                                    | Mean (SD)  | 3347 (955)         | 3797 (1397)             |
| <i>Number of clusters per Subcounty</i>              | Cherangani | 7                  | 7                       |
|                                                      | Endebes    | 2                  | 2                       |
|                                                      | Kiminini   | 2                  | 3                       |
|                                                      | Kwanza     | 4                  | 4                       |
|                                                      | Saboti     | 3                  | 2                       |
| <i>Number of clusters in each direction from KEU</i> | East       | 5                  | 5                       |
|                                                      | South      | 5                  | 5                       |
|                                                      | West       | 3                  | 4                       |
|                                                      | North      | 5                  | 4                       |

KEU – Kitale Eye unit

**Table S2: Diagnosis of the participants who attended Triage and Hospital appointments at Kitale Eye Unit in Trans Nzoia county, Kenya.**

| Eye conditions            | Triage      |         |                  |         | Hospital*   |         |                  |         |
|---------------------------|-------------|---------|------------------|---------|-------------|---------|------------------|---------|
|                           | Control arm |         | Intervention Arm |         | Control arm |         | Intervention Arm |         |
|                           | n/3070      | %       | n/9387           | %       | n/199       | %       | n/520            | %       |
| Allergic conjunctivitis   | 841         | (27.4%) | 2518             | (26.8%) | 21          | (10.6%) | 53               | (10.2%) |
| Presbyopia                | 718         | (23.4%) | 2609             | (27.8%) | 9           | (4.5%)  | 22               | (4.2%)  |
| Other Conjunctivitis      | 355         | (11.6%) | 857              | (9.1%)  | 1           | (0.5%)  | 10               | (1.9%)  |
| Cataracts                 | 324         | (10.6%) | 1038             | (11.1%) | 60          | (30.2%) | 128              | (24.6%) |
| Refractive errors         | 320         | (10.4%) | 1006             | (10.7%) | 50          | (25.1%) | 153              | (29.4%) |
| Normal                    | 153         | (5.0%)  | 441              | (4.7%)  | 2           | (1.0%)  | 6                | (1.2%)  |
| Retinal diseases          | 92          | (3.0%)  | 199              | (2.1%)  | 14          | (7.0%)  | 39               | (7.5%)  |
| Conjunctival growths      | 60          | (2.0%)  | 162              | (1.7%)  | 13          | (6.5%)  | 28               | (5.4%)  |
| Corneal diseases          | 53          | (1.7%)  | 127              | (1.4%)  | 4           | (2.0%)  | 11               | (2.1%)  |
| Glaucoma                  | 31          | (1.0%)  | 47               | (0.5%)  | 1           | (0.5%)  | 7                | (1.4%)  |
| Eye injury & FB in eye    | 11          | (0.4%)  | 29               | (0.3%)  | 2           | (1.0%)  | 3                | (0.6%)  |
| Chalazion & lid swellings | 7           | (0.2%)  | 35               | (0.4%)  | 4           | (2.0%)  | 14               | (2.7%)  |
| Uveitis                   | 4           | (0.1%)  | 20               | (0.2%)  | 2           | (1.0%)  | 3                | (0.6%)  |
| Lid inflammations         | 4           | (0.1%)  | 14               | (0.2%)  | 0           | (0.0%)  | 14               | (2.7%)  |
| Others                    | 97          | (3.2%)  | 285              | (3.0%)  | 16          | (8.0%)  | 43               | (8.3%)  |

\* 43 participants checked into the hospital but left before being attended to.
